# Supplementary material for: Characterisation of pathogen-specific regions and novel effector candidates in Fusarium oxysporum f. sp. cepae
Source: PubMed Central journal article supplement (PMC6131394; doi:10.1038/s41598-018-30335-7), 2018-09-10
Supplement: 41598_2018_30335_MOESM1_ESM.pdf [file 41598_2018_30335_MOESM1_ESM.pdf]

## Supplementary Information

### Characterisation of pathogen-specific regions and novel effector candidates in *Fusarium oxysporum* f. sp. *Cepae*

Andrew D. Armitage<sup>1</sup>, Andrew Taylor<sup>2</sup>, Maria K. Sobczyk<sup>1</sup>, Laura Baxter<sup>2</sup>, Bethany P.J. Greenfield<sup>1</sup>, Helen J. Bates<sup>1</sup>, Fiona Wilson<sup>1</sup>, Alison C. Jackson<sup>2</sup>, Sascha Ott<sup>3</sup>, Richard J. Harrison<sup>1\*</sup> and John P. Clarkson<sup>2</sup>

1. NIAB-EMR, New Road, East Malling, Kent, ME19 6BJ, UK

2. Warwick Crop Centre, School of Life Sciences, University of Warwick, Wellesbourne, Warwick, CV35 9EF, UK

3. Department of Computer Science, University of Warwick, CV4 7AL, UK

\*Correspondence: Email: [richard.harrison@emr.ac.uk](mailto:richard.harrison@emr.ac.uk)

## Supplementary Legends

### Supplementary Table 1

Accession numbers of *Fusarium oxysporum* (Fo) and *F. oxysporum* f. sp. *cepae* (Foc) assemblies and gene models deposited at Genbank as Whole Genome Shotgun projects.

### Supplementary Table 2

Identification of core (C), lineage specific (LS), and pathogen specific (PS) regions in *Fusarium oxysporum* f. sp. *lycopersici* (Fol) genome, through alignment of *F. oxysporum* (Fo) and *F. oxysporum* f. sp. *cepae* (Foc) assemblies. The percentage of non-masked bp covered by aligned sequence is shown for each reference contig.

### Supplementary Table 3

Distribution of features throughout the *Fusarium oxysporum* f. sp. *cepae* Fus2 genome. Numbers and density of genes predicted as secreted proteins, secreted carbohydrate active enzymes (CAZY), and secreted proteins with an effector-like structure (as predicted by EffectorP). Number and density of secondary metabolite clusters (Sec. Met. clusters) and MIMPs are also shown.

### Supplementary Table 4

Gene ID and ortholog groups of previously identified *Fusarium oxysporum* f. sp. *lycopersici* (Fol) genes Secreted In Xylem (*SIX*) pathogenicity genes following BLAST searches against *F. oxysporum* f. sp. *cepae* (Foc) Fus2 genome. Genes with no identifiable orthologs are marked as singletons. \* Evidence for an additional unpredicted *SIX3* gene was found in the Foc A23 assembly, spanning a contig break.

### Supplementary Table 5

ID, location, orthogroup, effector evidence, expression in planta and functional annotation for all genes predicted in pathogenic *Fusarium oxysporum* f. sp. *cepae* (Foc) isolate Fus2. Orthogroup contents show the number of proteins clustered into a particular orthogroup by isolate including pathogenic Foc isolates (Fus2, A23, 125), non-pathogenic *F. oxysporum* (Fo) isolates from onion (A13, PG, A28, CB3) and reference genomes for non-pathogenic Fo (isolate Fo47) and *F. oxysporum* f. sp. *lycopersici* (isolate 4287).

### Supplementary Table 6

SNP variants observed in secreted effector candidates located in pathogen-specific regions of *Fusarium oxysporum* f. sp. *cepae* (Foc) isolate Fus2, through comparison to other Foc isolates.

### Supplementary Table 7

Comparison of distribution of codon bias across different subsets of genes relative to all genes (t-test), calculated over: all, core, all lineage-specific (LS) chromosomes, LS chromosomes identified as pathogen-specific (PS) and LS chromosomes not identified as PS (non-PS).

### **Supplementary Table 8**

Enriched Interproscan terms associated with predicted proteins encoded on (A) pathogen specific (PS) and B) non-PS lineage specific (LS) regions in comparison to core regions. Annotation shown are those significant following Benjamini-Hochberg correction. Terms shown in bold are of particular interest as they were not significantly enriched in other LS regions, or nearly significant (P-values < 0.05 but failed multiple test correction) in other LS regions.

### **Supplementary Table 9**

Expression values (fpkm) and annotations of the 50 highest expressed core genes of *F. oxysporum* f. sp. *cepae* Fus2 and those lineage specific (LS) and pathogen-specific (PS) genes showing equal or greater expression.

### **Supplementary Table 10**

Identification of transcription factors within the genome of *Fusarium oxysporum* f. sp. *cepae* isolate Fus2 and their expression *in planta*. A) Transcription factors identified in pathogen specific (PS) and non-PS lineage specific (LS) regions. B) Homologs to known *F. oxysporum* f. sp. *lycopersici* transcription factors TF1-9 (B).

### **Supplementary Figure 1**

Duplication of genes between and within Fus2 chromosomes show different patterns between core, effector-enriched and LS regions. Links are shown between genes on a Foc contig and all other genes in that orthology group. Genes on core chromosomes (1, 2, 4, 5, 7, 8, 9, 10) do not show high levels of gene duplication across their entire length, with genes in shared ortholog groups primarily on telomeric regions and shared with telomeric regions of other chromosomes. Examples are provided for chromosomes 1 (a) and 4 (b). Duplicated genes on LS regions show a bias towards being shared with other LS regions. Effector enriched core chromosomes (11, 12, 13) show a greater numbers of duplications and are more likely to share genes with one another, as observed in chromosome 11 (c). Genes on Foc LS regions share large numbers of duplicated across their entire length, with duplications primarily shared with other LS regions. Example provided for LS contig 10 (d).

### **Supplementary Figure 2**

Repeat masked and gene-coding content of chromosomes and LS regions within Fol and Foc chromosomes / LS regions. Percentage of bp repeat masked in Fol (A) and Foc core (green), non-PS LS (orange) and PS (red) regions (B). Gene density is shown for Fol (C) and Foc (D) core, LS and PS regions. Shaded bars indicate the contribution of genes located in repeatmasked regions towards gene density

### Supplementary Table 1

Accession numbers of *Fusarium oxysporum* (Fo) and *F. oxysporum* f. sp *cepae* (Foc) assemblies and gene models deposited at Genbank as Whole Genome Shotgun projects.

| Organism | Isolate | Accession number | Version number |
|----------|---------|------------------|----------------|
| Foc      | Fus2    | MRCU00000000     | MRCU01000000   |
| Foc      | 125     | MRCV00000000     | MRCV01000000   |
| Foc      | A23     | MRCW00000000     | MRCW01000000   |
| Fo       | A13     | MRCX00000000     | MRCX01000000   |
| Fo       | A28     | MRCY00000000     | MRCY01000000   |
| Fo       | CB3     | MRCZ00000000     | MRCZ01000000   |
| Fo       | PG      | MRDA00000000     | MRDA01000000   |



## Supplementary Table 2

Identification of core (C), lineage specific (LS), and pathogen specific (PS) regions in *Fusarium oxysporum* f. sp. *lycopersici* (Fol) genome, through alignment of *F. oxysporum* (Fo) and *F. oxysporum* f. sp. *cepae* (Foc) assemblies. The percentage of non-masked bp covered by aligned sequence is shown for each reference contig.

| Alignment to Fol chromosome | Specificity | Fol 4287 | Foc Fus2 | Foc 125 | Foc A23 | Fo A13 | Fo A28 | Fo CB3 | Fo PG | Fo fo47 |
|-----------------------------|-------------|----------|----------|---------|---------|--------|--------|--------|-------|---------|
| 1                           | C           | 96       | 90       | 90      | 90      | 90     | 91     | 89     | 91    | 91      |
| 2                           | C           | 100      | 90       | 91      | 91      | 93     | 92     | 89     | 92    | 92      |
| 3                           | LS          | 56       | 6        | 9       | 9       | 13     | 13     | 12     | 11    | 7       |
| 4                           | C           | 100      | 96       | 96      | 96      | 93     | 95     | 95     | 95    | 96      |
| 5                           | C           | 100      | 95       | 96      | 96      | 96     | 92     | 96     | 95    | 96      |
| 6                           | LS          | 59       | 8        | 10      | 10      | 9      | 7      | 6      | 5     | 5       |
| 7                           | C           | 100      | 96       | 96      | 96      | 96     | 97     | 96     | 83    | 96      |
| 8                           | C           | 100      | 96       | 96      | 96      | 96     | 95     | 96     | 97    | 95      |
| 9                           | C           | 100      | 94       | 97      | 97      | 94     | 94     | 93     | 95    | 92      |
| 10                          | C           | 100      | 94       | 94      | 94      | 93     | 93     | 93     | 95    | 95      |
| 11                          | C           | 100      | 96       | 96      | 95      | 94     | 94     | 95     | 97    | 96      |
| 12                          | C           | 100      | 85       | 89      | 89      | 91     | 90     | 90     | 91    | 89      |
| 13                          | C           | 100      | 95       | 95      | 95      | 94     | 94     | 94     | 96    | 95      |
| 14                          | LS + PS     | 97       | 15       | 29      | 30      | 22     | 18     | 17     | 14    | 8       |
| 15                          | LS          | 57       | 7        | 9       | 9       | 12     | 13     | 6      | 10    | 14      |

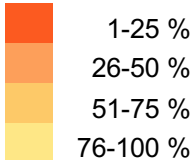

1-25 %  
26-50 %  
51-75 %  
76-100 %

### Supplementary Table 3

Distribution of features throughout the *Fusarium oxysporum* f. sp. *cepae* Fus2 genome. Numbers and density of genes predicted as secreted proteins, secreted carbohydrate active enzymes (CAZY), and secreted proteins with an effector-like structure (as predicted by EffectorP). Number and density of secondary metabolite clusters (Sec. Met. clusters) and MIMPs are also shown.

| Chromosome / contig | Region    | Chromosome length | Total genes | Secreted | CAZY | Eff. like structure | Sec. Met. clusters | MIMPs | Secreted (genes/Mb) | CAZY (genes/Mb) | Eff. like structure (genes/Mb) | Sec. Met. (clusters/Mb) | MIMPs (MIMPs/Mb) |
|---------------------|-----------|-------------------|-------------|----------|------|---------------------|--------------------|-------|---------------------|-----------------|--------------------------------|-------------------------|------------------|
| 1                   | Core      | 6433760           | 2217        | 109      | 25   | 30                  | 4                  | 0     | 16.94               | 3.89            | 4.66                           | 0.62                    | 0.00             |
| 2                   | Core      | 4147034           | 1718        | 128      | 30   | 31                  | 4                  | 2     | 30.87               | 7.23            | 7.48                           | 0.96                    | 0.48             |
| 4                   | Core      | 5388197           | 2027        | 170      | 38   | 27                  | 3                  | 0     | 31.55               | 7.05            | 5.01                           | 0.56                    | 0.00             |
| 5                   | Core      | 5171523           | 1764        | 117      | 27   | 27                  | 6                  | 0     | 22.62               | 5.22            | 5.22                           | 1.16                    | 0.00             |
| 7                   | Core      | 4882972           | 1716        | 103      | 26   | 31                  | 5                  | 0     | 21.09               | 5.32            | 6.35                           | 1.02                    | 0.00             |
| 8                   | Core      | 4140032           | 1421        | 98       | 25   | 26                  | 4                  | 0     | 23.67               | 6.04            | 6.28                           | 0.97                    | 0.00             |
| 9                   | Core      | 3815037           | 1299        | 82       | 21   | 19                  | 2                  | 1     | 21.49               | 5.50            | 4.98                           | 0.52                    | 0.26             |
| 10                  | Core      | 3356772           | 1185        | 112      | 28   | 23                  | 2                  | 1     | 33.37               | 8.34            | 6.85                           | 0.60                    | 0.30             |
| 11                  | Eff. rich | 3130441           | 1262        | 151      | 51   | 36                  | 4                  | 1     | 48.24               | 16.29           | 11.50                          | 1.28                    | 0.32             |
| 12                  | Eff. rich | 2929571           | 1148        | 186      | 65   | 37                  | 6                  | 5     | 63.49               | 22.19           | 12.63                          | 2.05                    | 1.71             |
| 13                  | Eff. rich | 3067455           | 1100        | 118      | 32   | 28                  | 6                  | 3     | 38.47               | 10.43           | 9.13                           | 1.96                    | 0.98             |
| Contig 14           | non-PS LS | 1115003           | 390         | 12       | 3    | 4                   | 0                  | 7     | 10.76               | 2.69            | 3.59                           | 0.00                    | 6.28             |
| Contig 20           | non-PS LS | 452227            | 155         | 6        | 2    | 2                   | 0                  | 13    | 13.27               | 4.42            | 4.42                           | 0.00                    | 28.75            |
| Contig 22           | non-PS LS | 181933            | 65          | 6        | 2    | 0                   | 0                  | 0     | 32.98               | 10.99           | 0.00                           | 0.00                    | 0.00             |
| Contig 16           | PS        | 2313841           | 713         | 41       | 6    | 14                  | 0                  | 28    | 17.72               | 2.59            | 6.05                           | 0.00                    | 12.10            |
| Contig 10           | PS        | 818454            | 292         | 9        | 2    | 6                   | 2                  | 28    | 11.00               | 2.44            | 7.33                           | 2.44                    | 34.21            |
| Contig 19           | PS        | 480286            | 181         | 17       | 2    | 9                   | 1                  | 30    | 35.40               | 4.16            | 18.74                          | 2.08                    | 62.46            |
| Contig 21           | PS        | 331997            | 130         | 7        | 1    | 5                   | 1                  | 34    | 21.08               | 3.01            | 15.06                          | 3.01                    | 102.41           |

#### Supplementary Table 4

Gene ID and ortholog groups of previously identified *Fusarium oxysporum* f. sp. *lycopersici* (Fol) genes Secreted In Xylem (SIX) pathogenicity genes following BLAST searches against *F. oxysporum* f. sp. *cepae* (Foc) Fus2 genome. Genes with no identifiable orthologs are marked as singletons. \* Evidence for an additional unpredicted SIX3 gene was found in the Foc A23 assembly, spanning a contig break.

| SIX gene | FoL gene      | Fus2 gene    | Fus2 contig    | Orthogroup      |
|----------|---------------|--------------|----------------|-----------------|
| SIX1     | FOXG_16418    | -            | -              | singleton       |
| SIX2     | FOXG_16416    | -            | -              | singleton       |
| SIX3     | FOXG_16398    | BFJ65_g18321 | Contig 19 (PS) | orthogroup12653 |
|          |               | BFJ65_g17808 | Contig 16 (PS) | orthogroup12653 |
| SIX4     | -             | -            | -              | -               |
| SIX5     | not annotated | BFJ65_g18413 | Contig 19 (PS) | orthogroup13175 |
| SIX6     | FOXG_14246    | -            | -              | -               |
| SIX7     | not annotated | BFJ65_g18647 | Contig 21 (PS) | orthogroup13885 |
| SIX8     | not annotated | -            | -              | -               |
| SIX9     | FOXG_14223    | BFJ65_g17715 | Contig 16 (PS) | orthogroup12321 |
|          |               | BFJ65_g14764 | Contig 10 (PS) | orthogroup12321 |
| SIX10    | FOXG_17457    | BFJ65_g18692 | Contig 21 (PS) | orthogroup13429 |
| SIX11    | not annotated | -            | -              | -               |
| SIX12    | not annotated | BFJ65_g18627 | Contig 21 (PS) | orthogroup14046 |
| SIX13    | not annotated | -            | -              | -               |
| SIX14    | not annotated | BFJ65_g18325 | Contig 19 (PS) | orthogroup13909 |

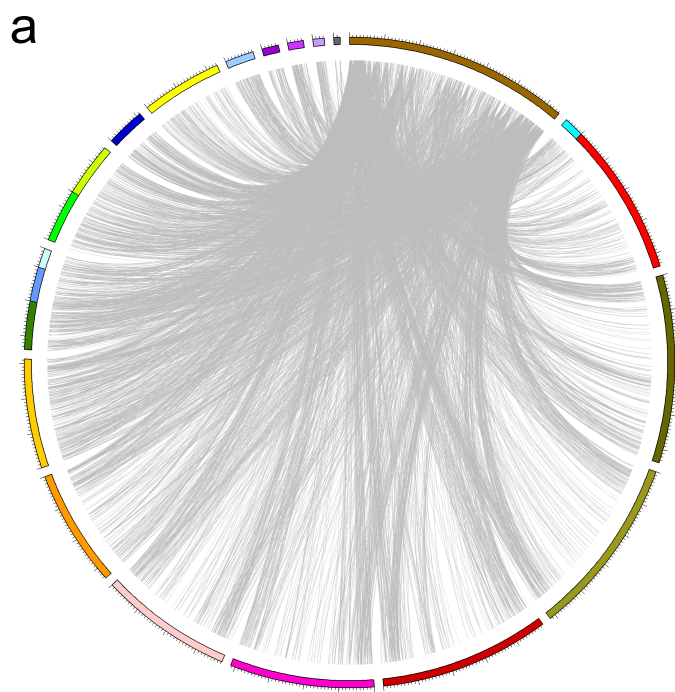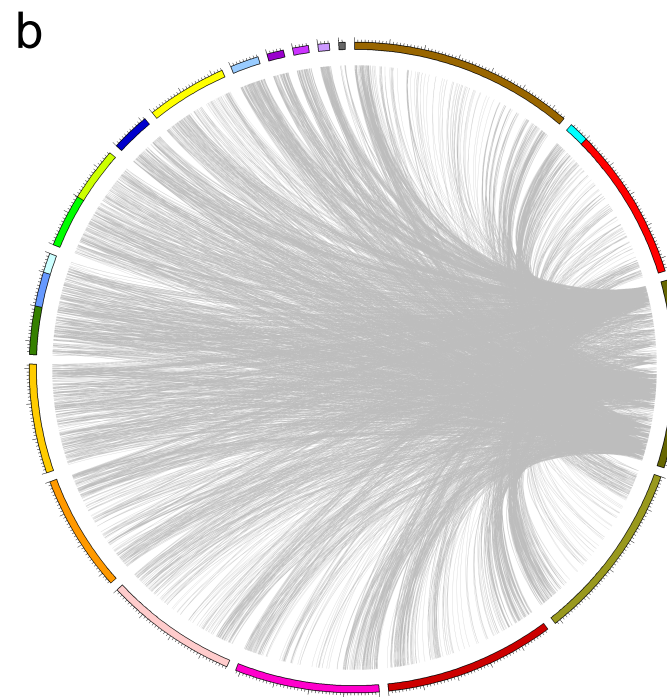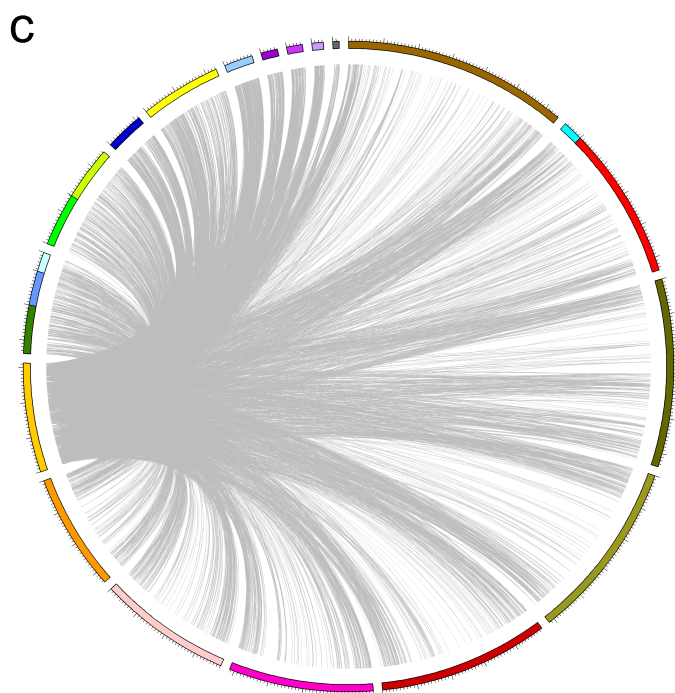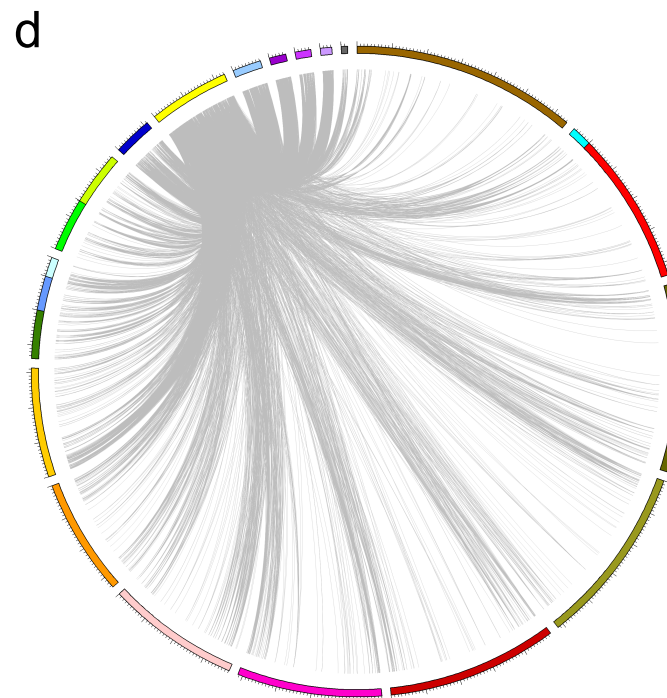

Supplementary Figure 1

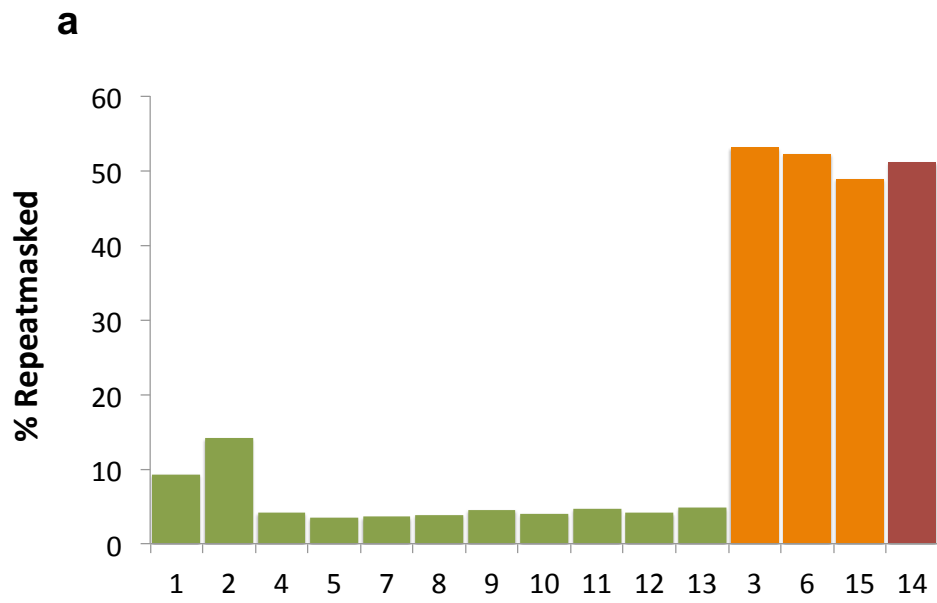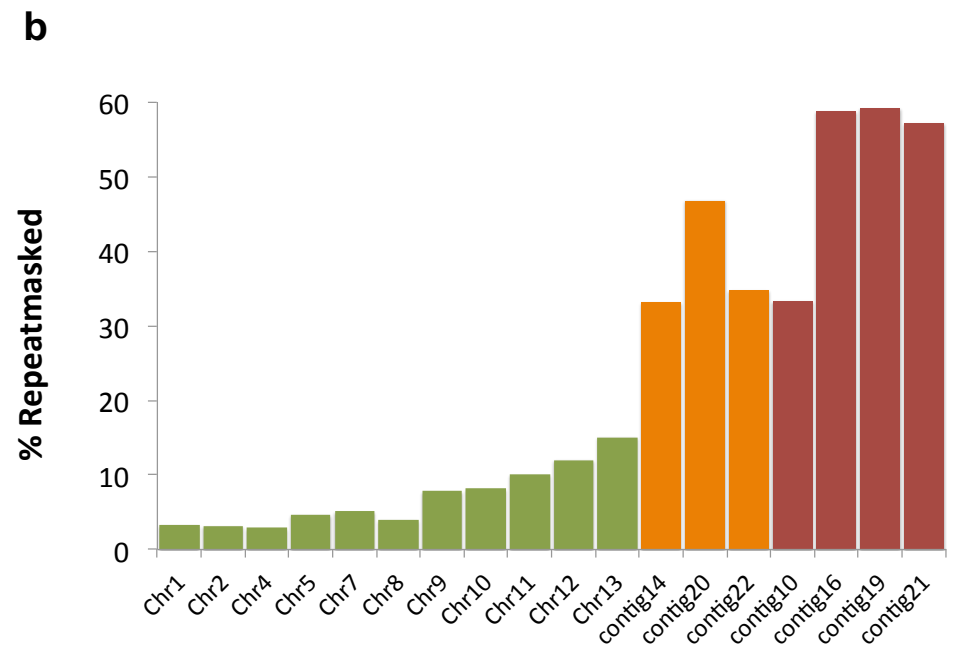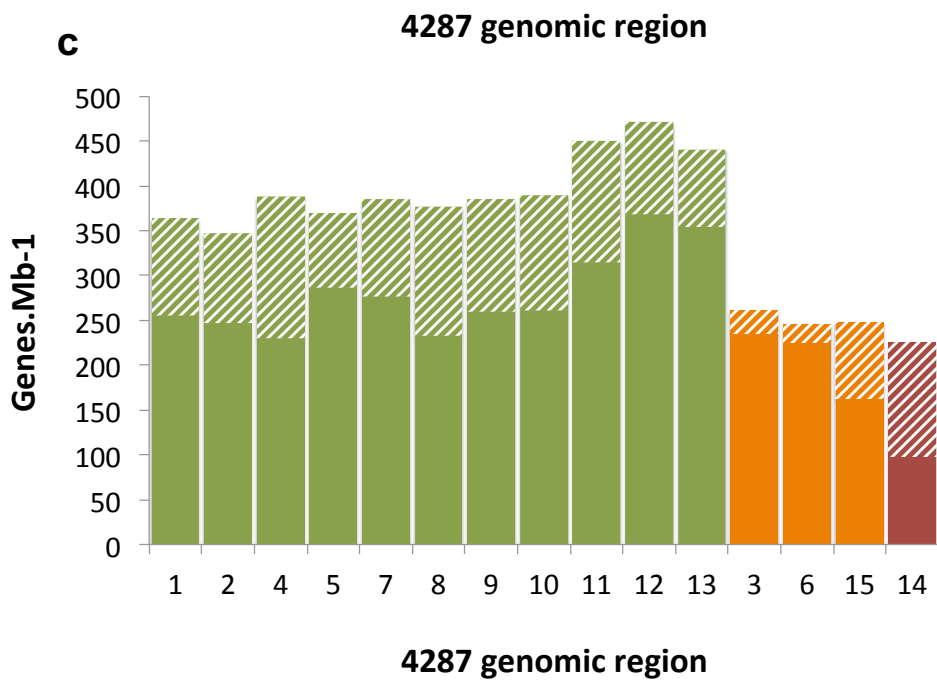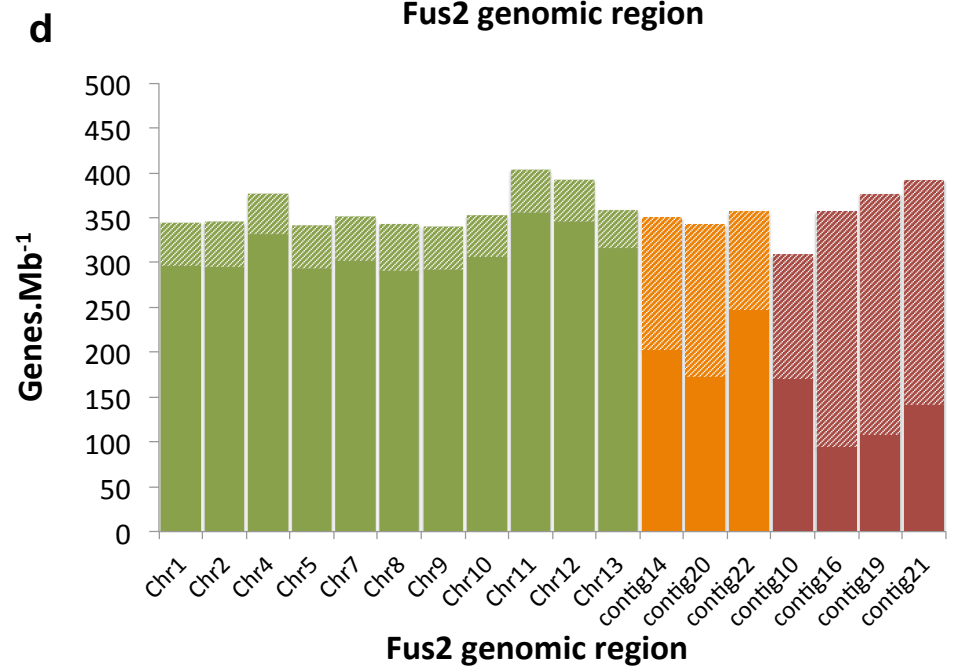

Supplementary Figure 2
